# Supplementary material for: Fluorescent carbon nano dots from lignite: unveiling the impeccable evidence for quantum confinement
Source: Royal Society of Chemistry journal article supplement (doi:10.1039/c6cp00867d), 2016-01-01
Supplement: c6cp00867d1.pdf [file c6cp00867d1.pdf]

Electronic Supplementary Material (ESI)

Supporting Information

**Fluorescent Carbon Nano Dots from Lignite: Unveiling the  
Impeccable Evidence for Quantum Confinement**

*Senthil Kumar Thiyagarajan, Suresh Raghupathy, Dharmalingam Palanivel,  
Kaviyarasan Raji, Perumal Ramamurthy\**

National Centre for Ultrafast Processes, University of Madras, Taramani Campus,  
Chennai - 600 113, India.

Email: prm60@hotmail.com

**Figure S1.** Characterisation of Lignite.

**Figure S2.** TEM image of Pristine solution obtained after reflux indicating the existence of both CNPs and layered structure of lignite, TEM image of CNP2 Solution before ethanol extraction & FTIR spectrum of Lignite and CNP1.

**Figure S3.** Characterisation of CNDs.

**Figure S4.** Statistical particle size distribution of CNP1, CNP2 & CD3.

**Figure S5.** Schematic representation of experimental setup for PLAL.

**Figure S6.** Excited Wavelength dependent emission spectrum of CNP1 & CNP2. Emission wavelength dependent excitation spectrum CNP1, CNP2 & CD3.

**Figure S7.** 2D Fluorescence Topographical Map of CNP1, CNP2, CD3\_LC, CD3\_MC, CD3\_HC & CD3M.

**Figure S8.** Characterisation of CD3M.

**Figure S9.** Fluorescence lifetime decay of **a)** CNP1 **b)** CNP2, recorded by exciting at 266 nm and monitored at different wavelength.

**Figure S10.** Fluorescence lifetime decay of **a)** CNP1 **b)** CNP2 **c)** CD3, recorded by exciting at 375 nm and monitored at different wavelength.

**Figure S11.** Absorption spectrum of CD3M measured through reflectance mode.

**Figure S12.** Variation in the emission spectrum of CD3M with respect to time at different relative humidity.

**Figure S13.** Phosphorescence lifetime decay of CD3M, recorded by exciting at 360 nm and the inset showing the corresponding standard deviation.

**Table S1.** Comparison of Infrared spectral data of Lignite, CNP2, CD3 and CD3M.

**Table S2.** Elemental composition of Lignite, CNP2 and CD3 obtained from XPS spectroscopy.

**Table S3.** Steady state photophysical data of CNP1, CNP2, CD3 in water and CD3M in solid state.

**Table S4.** Fluorescence Lifetime data of CD3 measured at different monitoring wavelength by exciting at 266 nm.

**Table S5.** Fluorescence Lifetime data of CNP2 measured at different monitoring wavelength by exciting at 266 nm.

**Table S6.** Fluorescence Lifetime data of CNP1 measured at different monitoring wavelength by exciting at 266 nm.

**Table S7.** Fluorescence Lifetime data of CD3 measured at different monitoring wavelength by exciting at 375 nm.

**Table S8.** Fluorescence Lifetime data of CNP2 measured at different monitoring wavelength by exciting at 375 nm.

**Table S9.** Fluorescence Lifetime data of CNP1 measured at different monitoring wavelength by exciting at 375 nm.

**Table S10.** Features of CNPs exfoliated by pulsed laser ablation on different carbon sources.  
Procedure for 2D fluorescence topographical mapping.

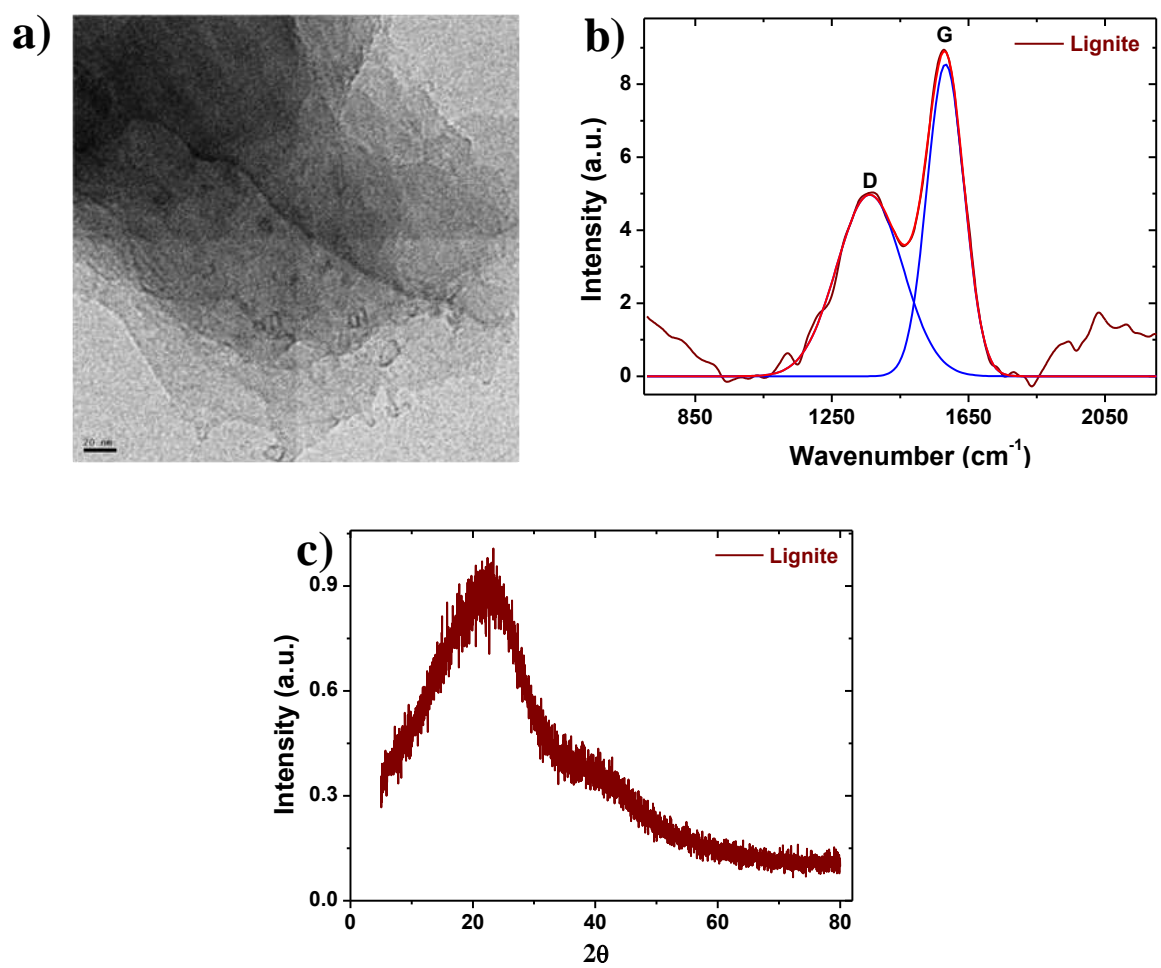

**Figure S1.** Characterisation of Lignite: **a)** TEM image of powdered lignite dispersed in ethanol and coated on a copper grid **b)** Raman spectrum of Lignite showing the characteristic D & G peak **c)** X-ray diffractogram of powdered Lignite

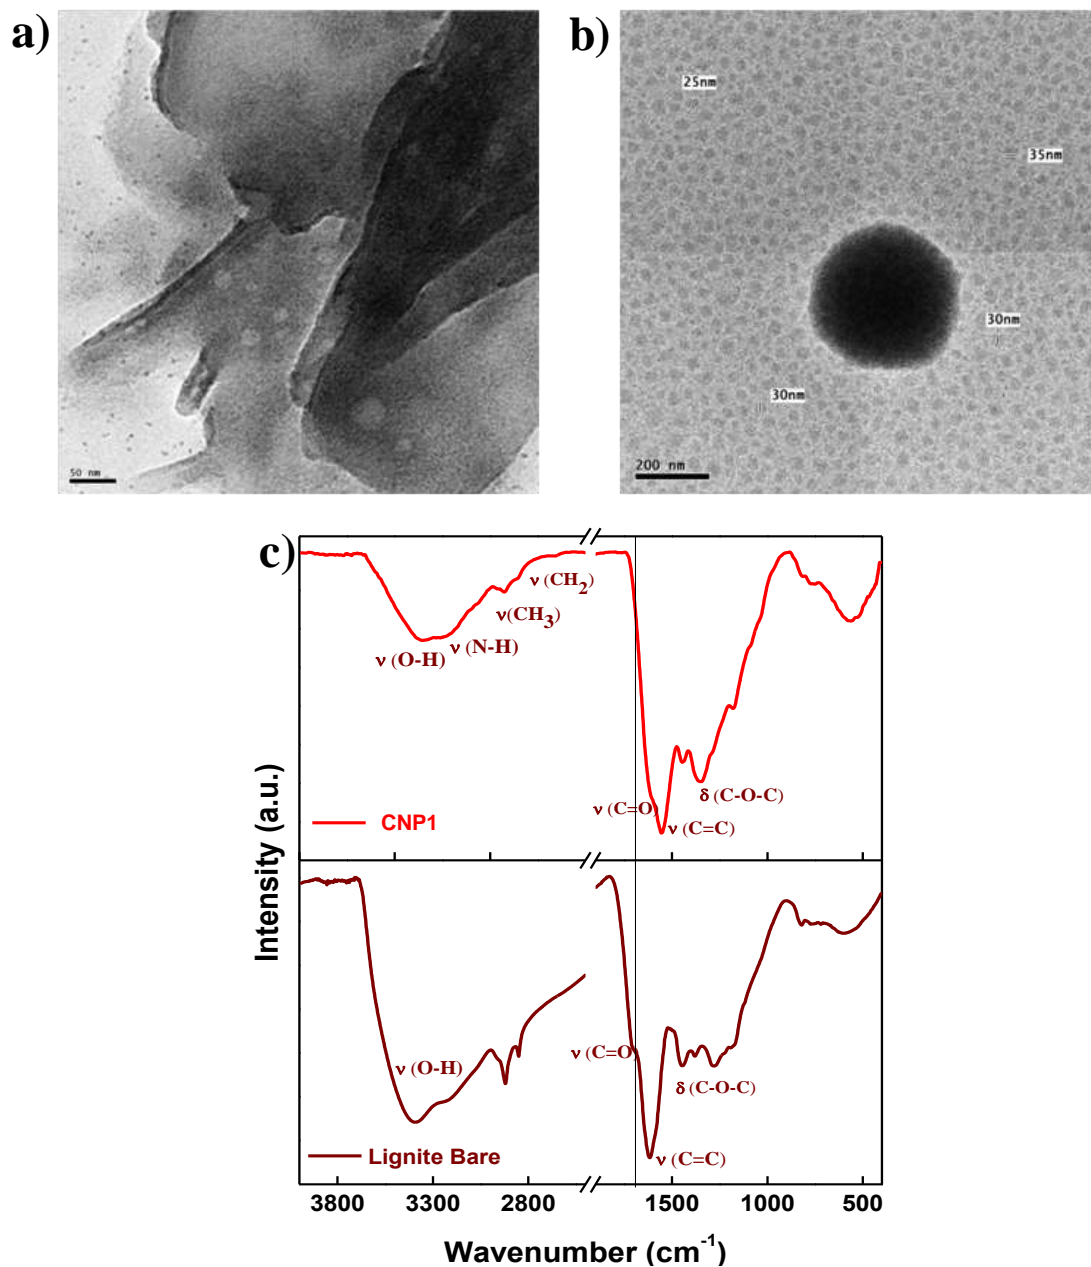

**Figure S2.** TEM image of **a)** Pristine solution obtained after reflux indicating the existence of both CNPs and layered structure of lignite **b)** Solution of CNP2 before ethanol extraction shows the existence of larger sized particles solubilised in 5 % EDA solution **c)** FTIR spectrum of Lignite and CNP1

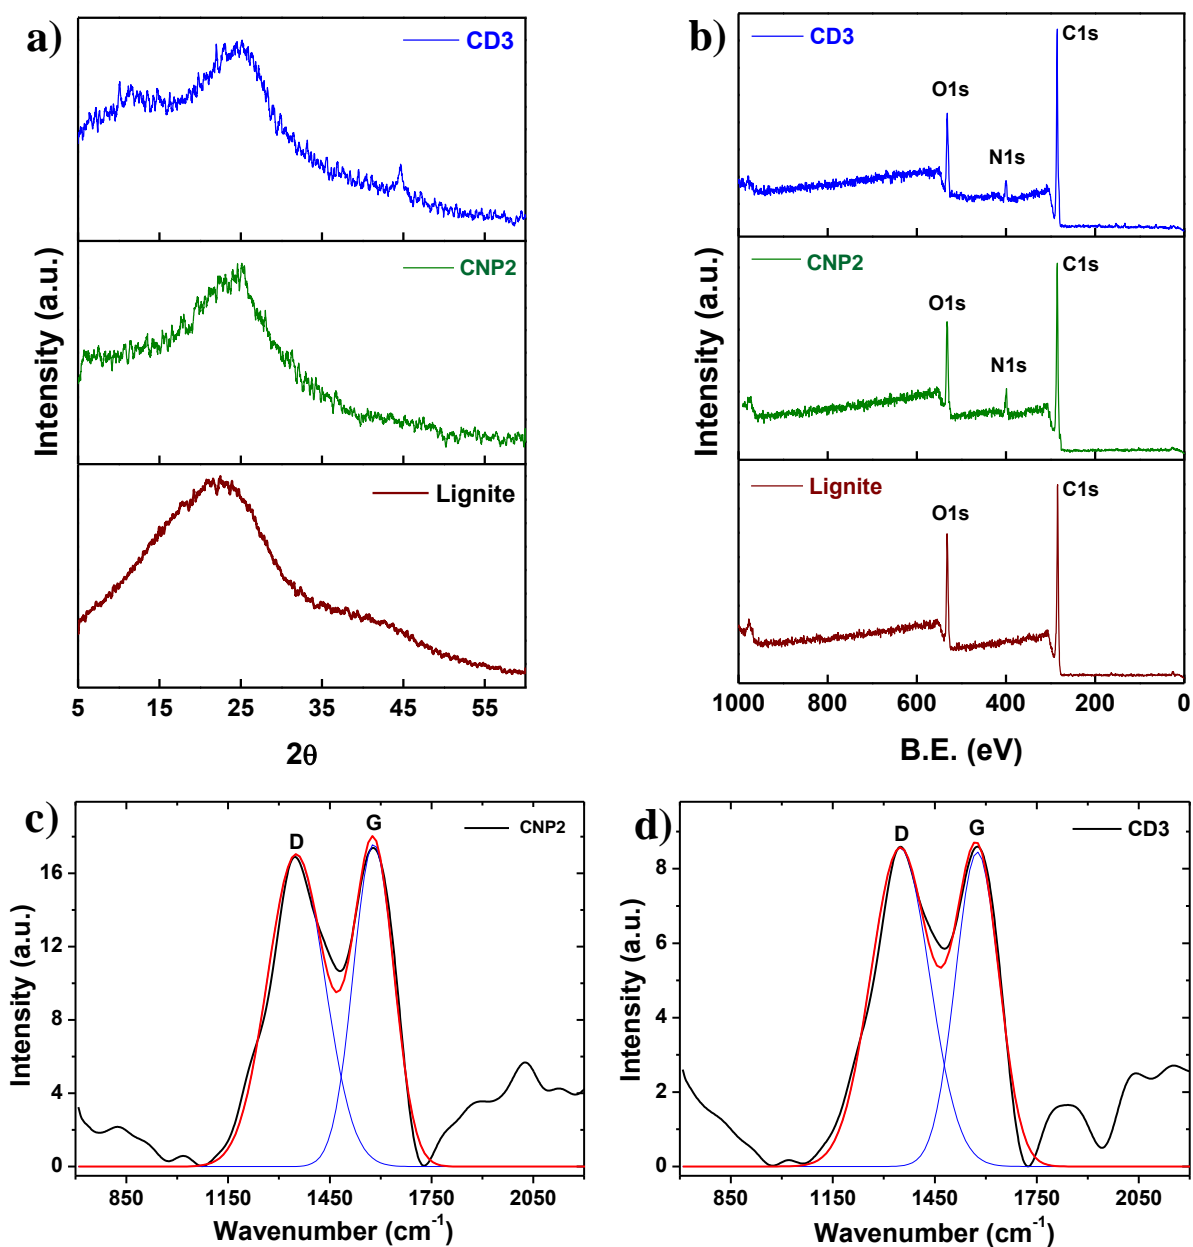

**Figure S3.** Characterisation of CNDs: **a)** X-ray diffractogram of powdered Lignite, CNP2, CD3 **b)** XPS survey spectrum of lignite, CNP2, CD3 **c)** Raman spectrum of CNP2 showing the characteristic D & G peak **d)** Raman spectrum of CD3 showing the characteristic D & G peak.

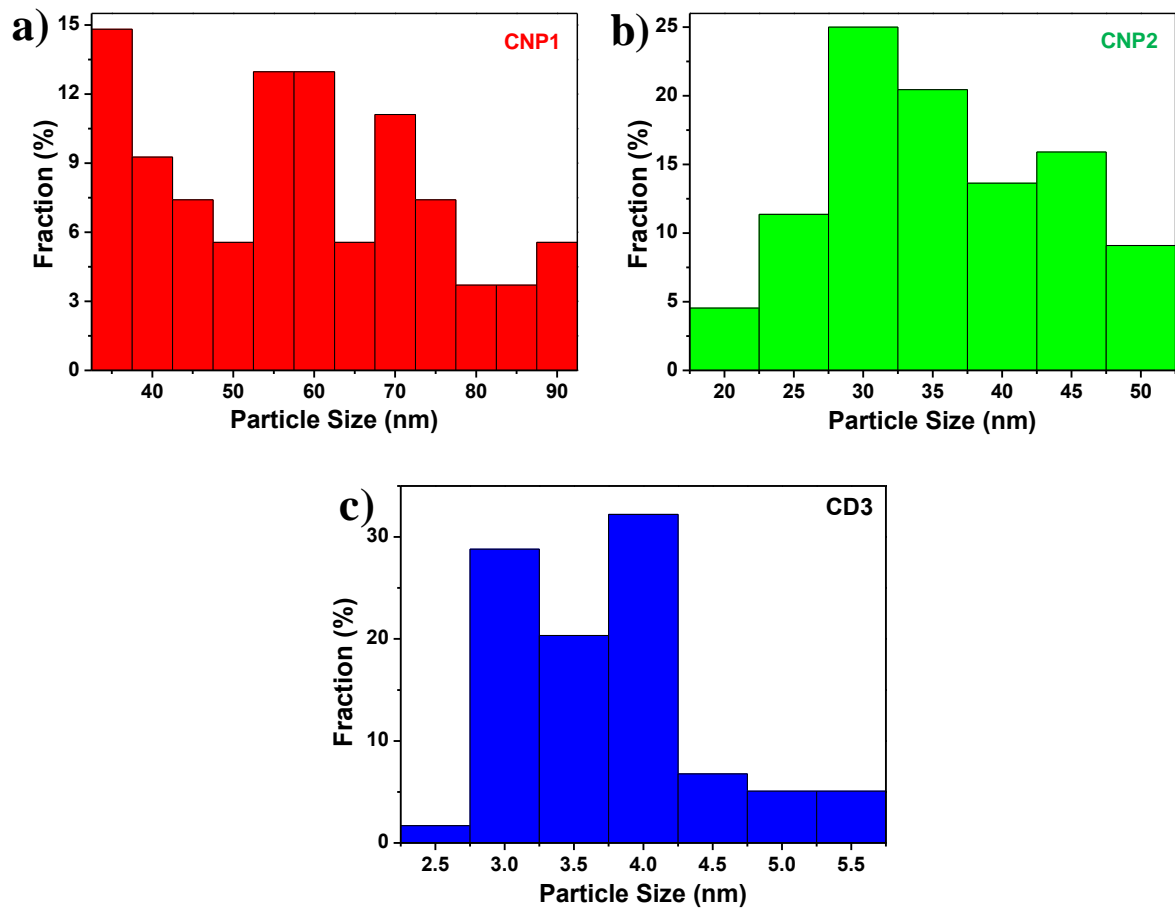

**Figure S4.** Statistical particle size distribution of **a) CNP1** **b) CNP2** **c) CD3**.

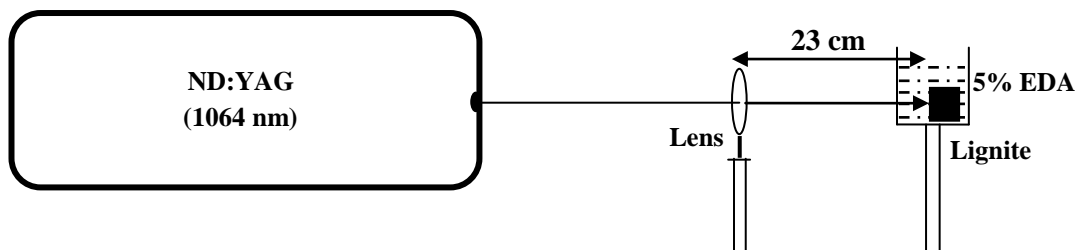

**Figure S5.** Schematic representation of experimental setup for PLA in 5% EDA solution.

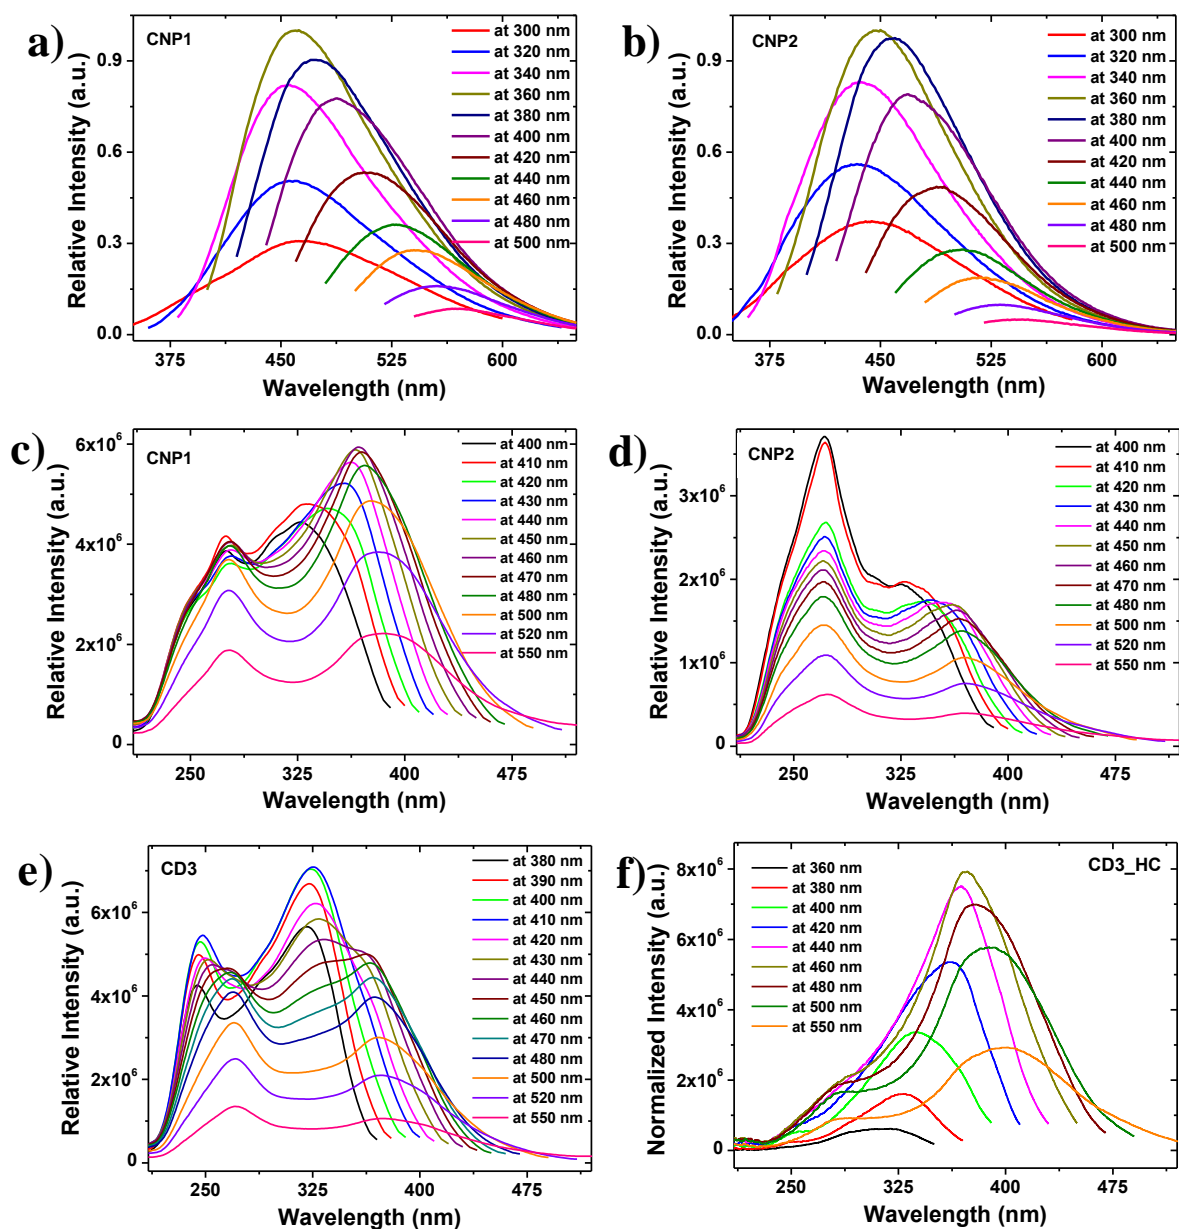

**Figure S6.** Excited Wavelength dependent emission spectrum of **a) CNP1** **b) CNP2**; Emission wavelength dependent excitation spectrum **c) CNP1** **d) CNP2** **e) CD3** **f) CD3\_HC**

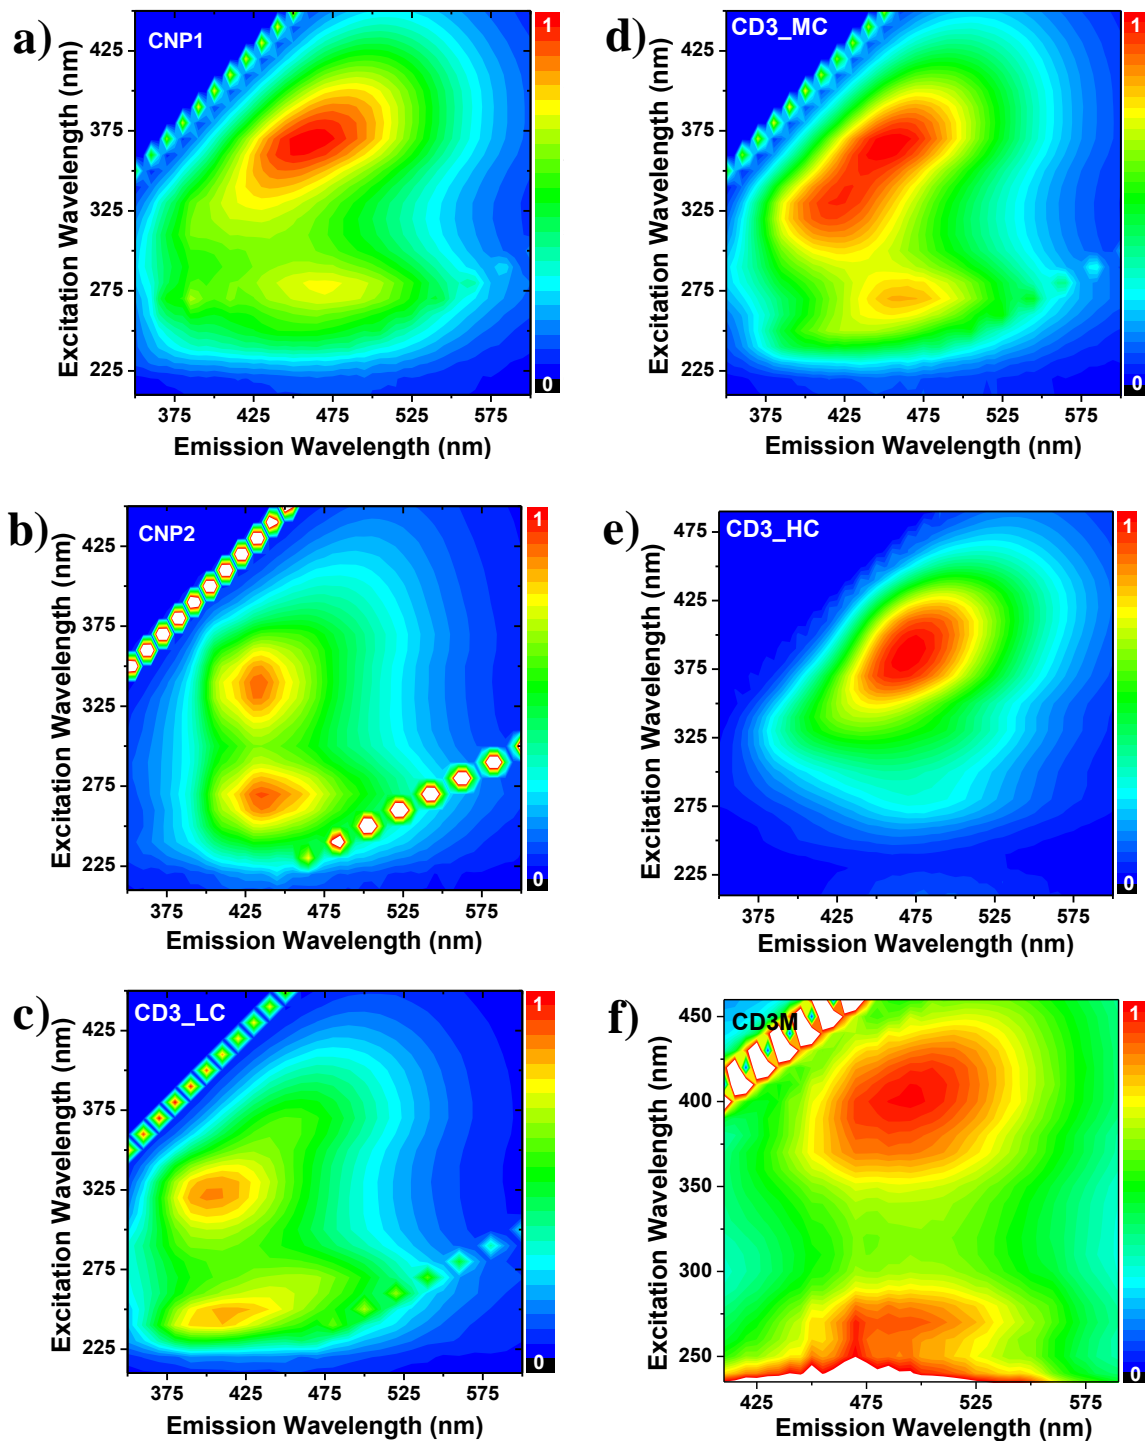

**Figure S7.** 2D Fluorescence Topographical Map of **a) CNP1** **b) CNP2** **c) CD3\_LC (0.1 mg/mL)** **d) CD3\_MC (0.4 mg/mL)** **e) CD3\_HC (1mg/mL)** **f) CD3M**



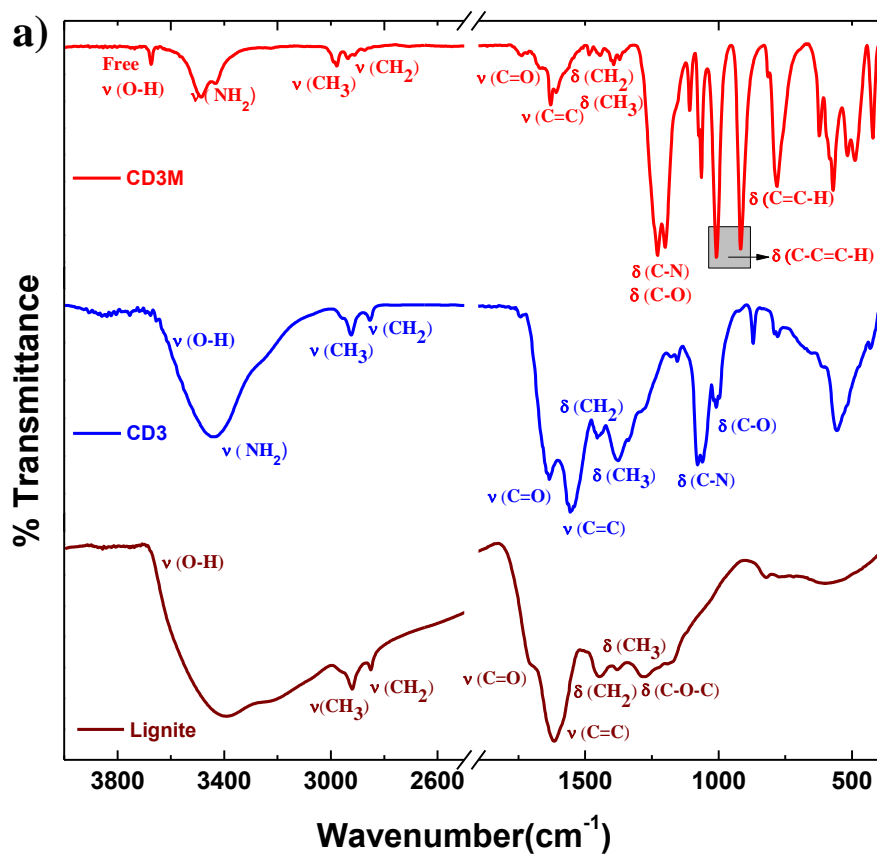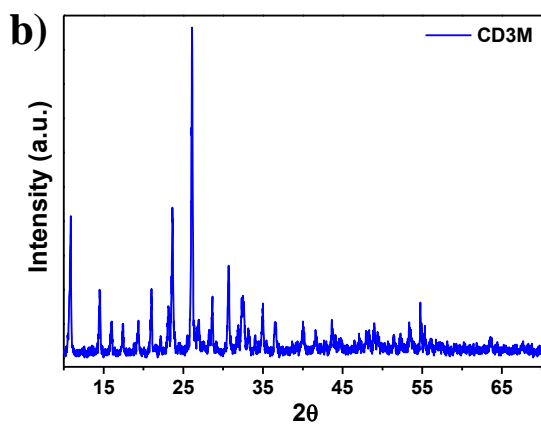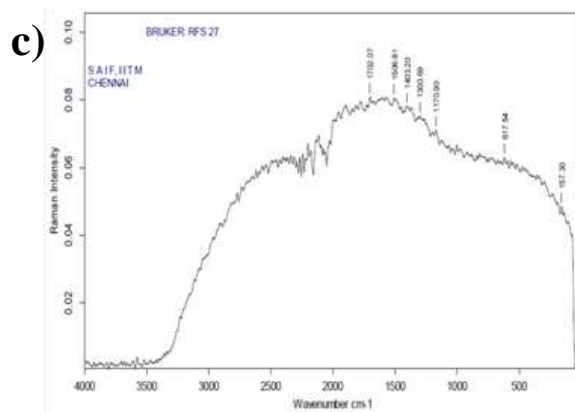

**Figure S8.** Characterisation of CD3M **a)** Stacked IR spectrum of Lignite, CD3, CD3M (from bottom to top) **b)** X-ray diffractogram of powdered CD3M **c)** Raman Spectrum of CD3M in solid state displaying broad band, characteristics of photoluminescent material.

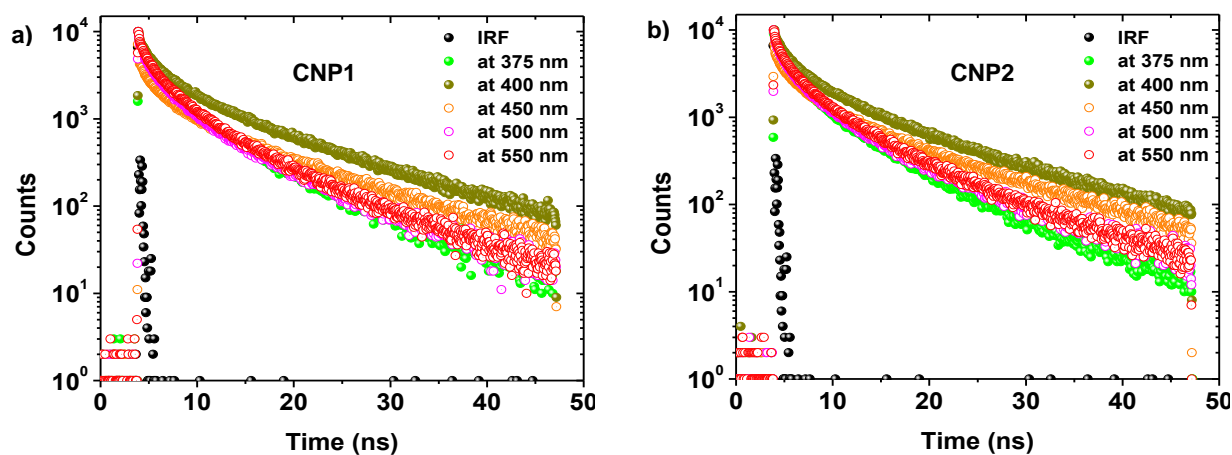

**Figure S9.** Fluorescence lifetime decay of a) CNP1 b) CNP2, recorded by exciting at 266 nm and monitored at different wavelength.

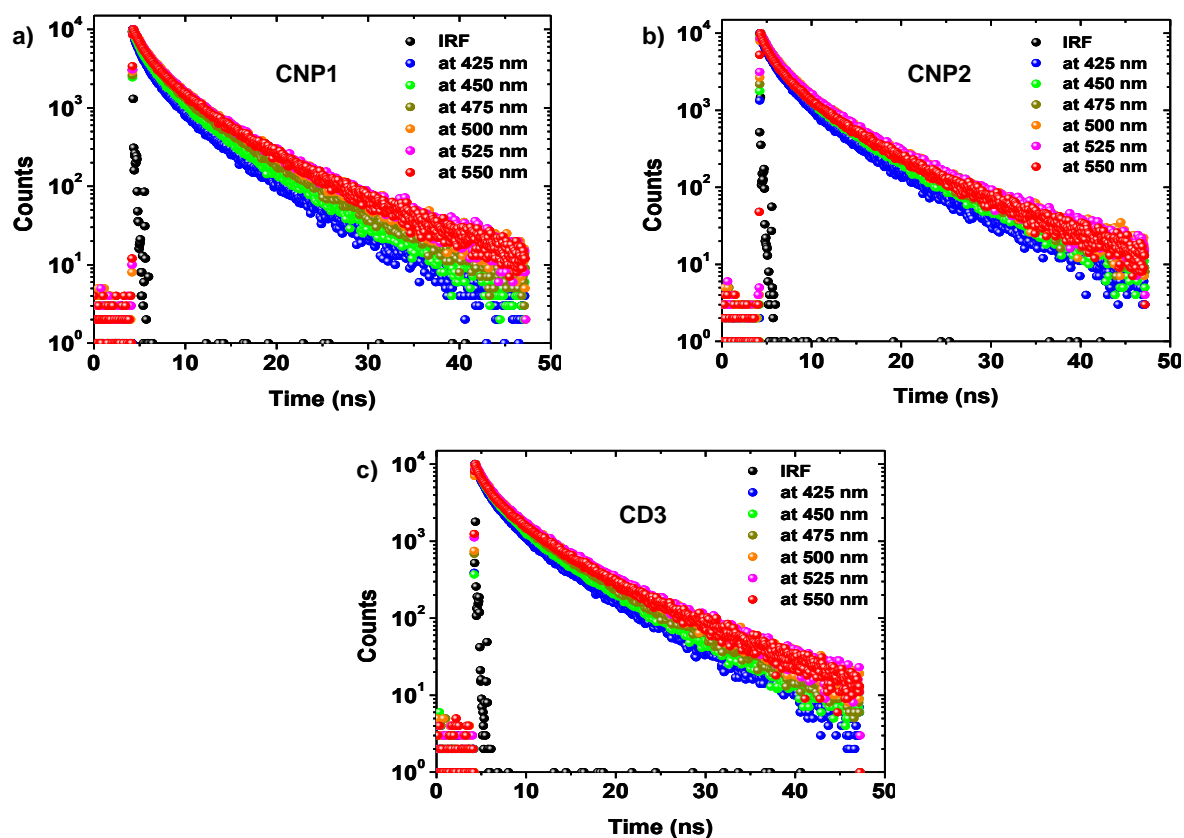

**Figure S10.** Fluorescence lifetime decay of a) CNP1 b) CNP2 c) CD3, recorded by exciting at 375 nm and monitored at different wavelength.

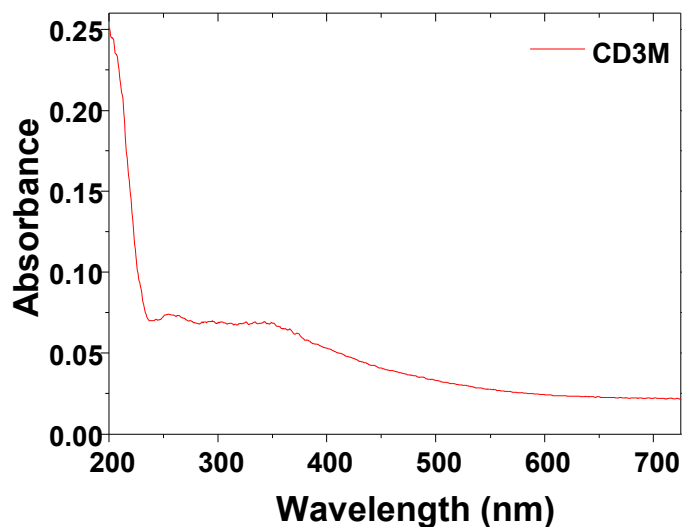

Figure S11. Absorption spectrum of CD3M measured through reflectance mode

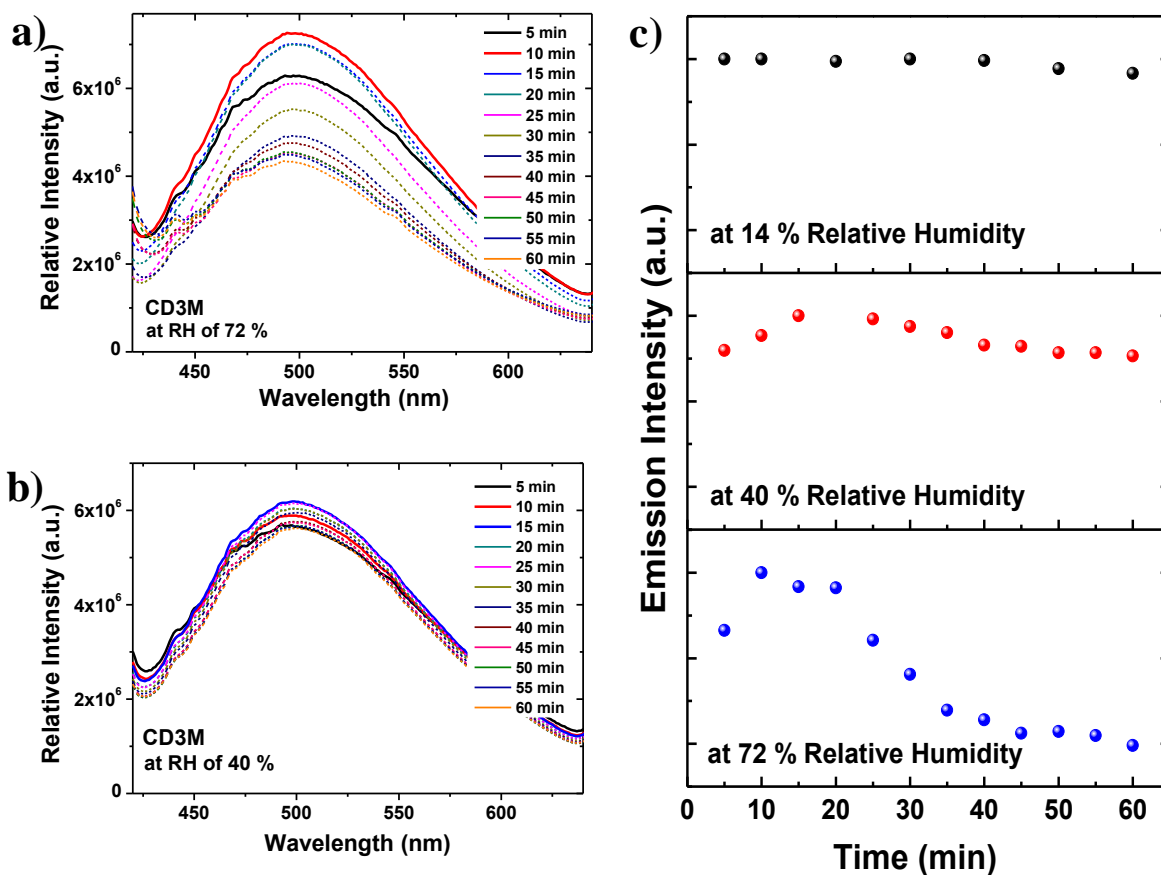

Figure S12. Variation in the emission spectrum of CD3M with respect to time at the relative humidity of a) 72 % b) 40 % c) Variation in the emission intensity of CD3M with respect to time at the relative humidity of 72 %, 40 % & 14 % (from bottom to top).

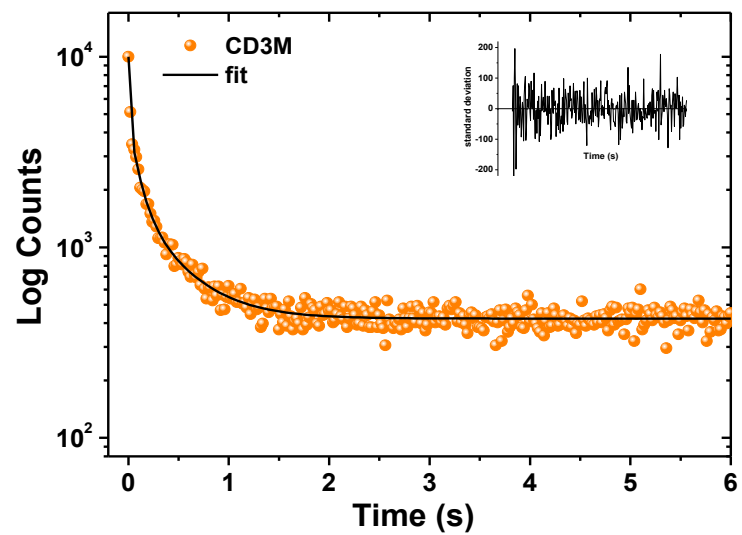

**Figure S13.** Phosphorescence lifetime decay of CD3M, recorded by exciting at 360 nm and the inset showing the corresponding standard deviation.

**Table S1. Comparison of Infrared spectral data of Lignite, CNP2, CD3 and CD3M**

| Functional Group                           | Wavenumber (cm <sup>-1</sup> )     |                                    |                            |                            |
|--------------------------------------------|------------------------------------|------------------------------------|----------------------------|----------------------------|
|                                            | Lignite                            | CNP2                               | CD3                        | CD3M                       |
| <b>Stretching:</b>                         |                                    |                                    |                            |                            |
| O-H                                        | 3680 - 3200 ( <i>brd</i> )         | 3660 - 3200 ( <i>brd</i> )         | 3650 - 3200 ( <i>brd</i> ) | 3674 ( <i>shp</i> )        |
| N-H                                        | -                                  | 3660 - 3200 ( <i>brd</i> )         | 3650 - 3200 ( <i>brd</i> ) | 3600 - 3300 ( <i>brd</i> ) |
| C-H (-CH <sub>3</sub> & -CH <sub>2</sub> ) | 2920 & 2850                        | 2926 & 2860                        | 2922 & 2850                | 2978 & 2937                |
| C=O                                        | 1707 ( <i>str</i> )                | 1612 ( <i>str</i> )                | 1633( <i>str</i> )         | 1670 ( <i>w</i> )          |
| C=C                                        | 1616 ( <i>str</i> )                | 1573 ( <i>str</i> )                | 1550 ( <i>str</i> )        | 1630 ( <i>w</i> )          |
| C-O-C                                      | 1300 - 1050 ( <i>brd</i> )         | 1300 - 1050 ( <i>brd</i> )         | 1068 & 869 ( <i>str</i> )  | 1210 ( <i>str</i> )        |
| <b>Bending :</b>                           |                                    |                                    |                            |                            |
| -CH <sub>2</sub> & -CH <sub>3</sub>        | 1445 & 1381                        | 1448 & 1386                        | 1454 & 1373                | 1465 & 1380                |
| C-O                                        | Merged inside the broad C-O-C band | Merged inside the broad C-O-C band | 997                        | 1006                       |
| C-N                                        | -                                  | Merged inside the broad C-O-C band | 1009                       | 1157                       |

**Table S2. Elemental composition of Lignite, CNP2 and CD3 obtained from XPS spectroscopy.**

| <b>Element</b>  | <b>Lignite<br/>(in %)</b> | <b>CNP2<br/>(in %)</b> | <b>CD3<br/>(in %)</b> |
|-----------------|---------------------------|------------------------|-----------------------|
| <b>Carbon</b>   | 61.74                     | 58.66                  | 62.85                 |
| <b>Oxygen</b>   | 38.26                     | 34.12                  | 30.11                 |
| <b>Nitrogen</b> | -                         | 7.22                   | 7.04                  |

**Table S3. Steady state photophysical data of CNP1, CNP2, CD3 in water and CD3M in solid state.**

| <b>Sample</b> | <b><math>\lambda_{abs}^{max}</math> (nm)</b> | <b><math>\lambda_{emi}^{max}</math> (nm)</b> | <b><math>\phi_f</math> (%)</b> |
|---------------|----------------------------------------------|----------------------------------------------|--------------------------------|
| <b>CNP1</b>   | 260, 325                                     | 468                                          | 4.5                            |
| <b>CNP2</b>   | 262, 323                                     | 435                                          | 5.1                            |
| <b>CD3</b>    | 222, 330                                     | 403                                          | 6.0                            |
| <b>CD3M</b>   | 254, 348                                     | 493                                          | 34.5                           |

**Table S4. Fluorescence Lifetime data of CD3 measured at different monitoring wavelength by exciting at 266 nm.**

| CD3                                 |               |               |               |        |        |        |                   |          |
|-------------------------------------|---------------|---------------|---------------|--------|--------|--------|-------------------|----------|
| Wavelength Monitored $\lambda$ (nm) | $\tau_1$ (ns) | $\tau_2$ (ns) | $\tau_3$ (ns) | A1 (%) | A2 (%) | A3 (%) | $\tau_{avg}$ (ns) | $\chi^2$ |
| 350                                 | 0.702         | 1.69          | 7.15          | 32.22  | 51.69  | 16.09  | 1.27              | 1.31     |
| 375                                 | 0.569         | 1.81          | 7.83          | 28.05  | 47.25  | 24.70  | 1.27              | 1.11     |
| 400                                 | 0.508         | 2.10          | 7.41          | 20.04  | 42.29  | 37.67  | 1.54              | 1.20     |
| 450                                 | 0.371         | 2.33          | 7.53          | 7.55   | 40.28  | 52.17  | 2.24              | 1.03     |
| 500                                 | 0.254         | 2.13          | 7.58          | 5.06   | 32.25  | 62.69  | 2.31              | 1.12     |
| 550                                 | 0.287         | 2.14          | 7.68          | 5.78   | 29.58  | 64.64  | 2.36              | 1.07     |

**Table S5. Fluorescence Lifetime data of CNP2 measured at different monitoring wavelength by exciting at 266 nm.**

| CNP2                                |               |               |               |        |        |        |                   |          |
|-------------------------------------|---------------|---------------|---------------|--------|--------|--------|-------------------|----------|
| Wavelength Monitored $\lambda$ (nm) | $\tau_1$ (ns) | $\tau_2$ (ns) | $\tau_3$ (ns) | A1 (%) | A2 (%) | A3 (%) | $\tau_{avg}$ (ns) | $\chi^2$ |
| 375                                 | 0.303         | 2.01          | 7.16          | 5.25   | 33.68  | 61.07  | 2.34              | 1.12     |
| 400                                 | 0.256         | 2.06          | 9.53          | 2.96   | 22.24  | 74.80  | 3.31              | 1.17     |
| 450                                 | 0.218         | 2.15          | 10.12         | 3.14   | 22.79  | 74.08  | 3.11              | 1.01     |
| 500                                 | 0.223         | 2.04          | 7.62          | 5.20   | 34.17  | 60.63  | 2.08              | 1.12     |
| 550                                 | 0.243         | 2.10          | 7.68          | 5.11   | 32.02  | 62.88  | 2.25              | 1.16     |

**Table S6. Fluorescence Lifetime data of CNP1 measured at different monitoring wavelength by exciting at 266 nm.**

| CNP1                                   |               |               |               |        |        |        |                   |          |
|----------------------------------------|---------------|---------------|---------------|--------|--------|--------|-------------------|----------|
| Wavelength Monitored<br>$\lambda$ (nm) | $\tau_1$ (ns) | $\tau_2$ (ns) | $\tau_3$ (ns) | A1 (%) | A2 (%) | A3 (%) | $\tau_{avg}$ (ns) | $\chi^2$ |
| 375                                    | 0.277         | 1.87          | 7.02          | 4.48   | 30.37  | 65.15  | 2.39              | 1.21     |
| 400                                    | 0.229         | 2.16          | 10.16         | 3.03   | 23.09  | 73.88  | 3.21              | 1.03     |
| 450                                    | 0.269         | 2.27          | 10.37         | 3.85   | 23.07  | 73.08  | 3.17              | 1.08     |
| 500                                    | 0.219         | 2.03          | 7.69          | 5.35   | 34.91  | 59.75  | 2.02              | 1.22     |
| 550                                    | 0.249         | 2.16          | 7.67          | 5.29   | 34.53  | 60.19  | 2.22              | 1.12     |

**Table S7. Fluorescence Lifetime data of CD3 measured at different monitoring wavelength by exciting at 375 nm.**

| CD3                                    |               |               |               |        |        |        |                   |          |
|----------------------------------------|---------------|---------------|---------------|--------|--------|--------|-------------------|----------|
| Wavelength Monitored<br>$\lambda$ (nm) | $\tau_1$ (ns) | $\tau_2$ (ns) | $\tau_3$ (ns) | A1 (%) | A2 (%) | A3 (%) | $\tau_{avg}$ (ns) | $\chi^2$ |
| 425                                    | 0.373         | 2.04          | 6.48          | 6.82   | 44.27  | 48.92  | 2.10              | 1.14     |
| 450                                    | 0.415         | 2.15          | 6.43          | 6.08   | 40.29  | 53.64  | 2.40              | 1.10     |
| 475                                    | 0.390         | 2.13          | 6.55          | 4.77   | 38.02  | 57.21  | 2.58              | 1.13     |
| 500                                    | 0.381         | 2.14          | 6.71          | 4.35   | 34.53  | 61.12  | 2.73              | 0.99     |
| 525                                    | 0.430         | 2.20          | 6.88          | 5.42   | 33.28  | 61.29  | 2.73              | 1.04     |
| 550                                    | 0.404         | 2.17          | 6.95          | 5.69   | 33.93  | 60.37  | 2.61              | 1.17     |



**Table S8. Fluorescence Lifetime data of CNP2 measured at different monitoring wavelength by exciting at 375 nm.**

| CNP2                                   |               |               |               |        |        |        |                   |          |
|----------------------------------------|---------------|---------------|---------------|--------|--------|--------|-------------------|----------|
| Wavelength Monitored<br>$\lambda$ (nm) | $\tau_1$ (ns) | $\tau_2$ (ns) | $\tau_3$ (ns) | A1 (%) | A2 (%) | A3 (%) | $\tau_{avg}$ (ns) | $\chi^2$ |
| 425                                    | 0.402         | 2.12          | 6.63          | 7.06   | 48.11  | 44.83  | 2.13              | 1.23     |
| 450                                    | 0.400         | 2.15          | 6.65          | 5.83   | 43.85  | 50.32  | 2.35              | 1.09     |
| 475                                    | 0.443         | 2.25          | 6.71          | 5.49   | 41.15  | 53.36  | 2.54              | 1.09     |
| 500                                    | 0.444         | 2.34          | 7.01          | 5.27   | 41.60  | 53.13  | 2.68              | 1.07     |
| 525                                    | 0.488         | 2.27          | 6.87          | 6.69   | 38.32  | 55.29  | 2.63              | 1.09     |
| 550                                    | 0.396         | 2.02          | 6.62          | 6.53   | 35.70  | 57.77  | 2.34              | 1.07     |

**Table S9. Fluorescence Lifetime data of CNP1 measured at different monitoring wavelength by exciting at 375 nm.**

| CNP1                                   |               |               |               |        |        |        |                   |          |
|----------------------------------------|---------------|---------------|---------------|--------|--------|--------|-------------------|----------|
| Wavelength Monitored<br>$\lambda$ (nm) | $\tau_1$ (ns) | $\tau_2$ (ns) | $\tau_3$ (ns) | A1 (%) | A2 (%) | A3 (%) | $\tau_{avg}$ (ns) | $\chi^2$ |
| 425                                    | 0.240         | 1.66          | 5.32          | 7.45   | 40.71  | 51.84  | 1.53              | 1.09     |
| 450                                    | 0.411         | 2.22          | 6.23          | 7.70   | 44.60  | 47.70  | 2.15              | 1.11     |
| 475                                    | 0.353         | 2.23          | 6.38          | 5.89   | 43.20  | 50.90  | 2.27              | 0.95     |
| 500                                    | 0.375         | 2.28          | 6.63          | 5.23   | 39.89  | 54.88  | 2.52              | 1.12     |
| 525                                    | 0.433         | 2.28          | 6.56          | 6.73   | 36.86  | 56.40  | 2.48              | 1.17     |
| 550                                    | 0.415         | 2.19          | 6.62          | 6.85   | 36.88  | 56.27  | 2.39              | 1.13     |

**Table S10. Features of CNPs exfoliated from different carbon sources by Pulsed Laser Ablation.**

| Targeted Source                                     | Product                   | Particle size | Quantum yield | Lifetime      | Reference                                                   |
|-----------------------------------------------------|---------------------------|---------------|---------------|---------------|-------------------------------------------------------------|
| Graphite powder blended with cement                 | Aggregated nano particles | 5 nm          | -             | -             | <i>J. Am. Chem. Soc.</i> , 2006, <b>128</b> , 7756          |
| Graphite powder in PEG <sub>200N</sub>              | C-Dots                    | 3.2 nm        | 5 %           | NA            | <i>J. Mater. Chem.</i> , 2009, <b>19</b> , 484–488          |
| Carbon nano particles (~ 50 nm) in organic solvents | CQDs                      | < 10 nm       | NA            | NA            | <i>Chem. Commun.</i> , 2011, <b>47</b> , 932–934            |
| Carbon targets in water                             | CNPs                      | > 50 nm       | NA            | 2.06 ns       | <i>Sensors and Actuators B</i> , 2010, <b>145</b> , 702–707 |
| <sup>13</sup> C powder mixed with graphite cement   | C-Dots                    | 4-5 nm        | 20 %          | NA            | <i>J. Phys. Chem. C</i> , 2009, <b>113</b> , 18110.         |
| Graphite powder in N-methyl pyrrolidone             | C-Dots                    | 1.5 - 3.5 nm  | NA            | NA            | <i>Optical materials express</i> , 2012, <b>2</b> , 490.    |
| Mixture of Benzene and Ni(II)oxide powder           | GQDs                      | 3.42          | 5.5 %         | NA            | <i>Carbon</i> , 2013, <b>64</b> , 341                       |
| <b>CD3</b>                                          | <b>CQDs</b>               | <b>3.5 nm</b> | <b>6 %</b>    | <b>~ 2 ns</b> | <b>In this work</b>                                         |

### Procedure for 2D fluorescence topographical mapping

2D fluorescence topographical mapping were recorded using Fluoromax 4P spectrofluorometer, by simultaneously scanning the excitation and emission monochromator in the excitation wavelength range 200 – 450 nm, with constant wavelength differences  $\Delta\lambda$  (=10 nm) between them and emission spectra were recorded in the wavelength range of 350 - 650 nm in steps of 10 nm. Synchronous scan fluorescence mapping were plotted using Windows-based software Origin 7.5.
